# Supplementary material for: Iodide-Mediated Etching of Gold Nanostar for the Multicolor Visual Detection of Hydrogen Peroxide
Source: MDPI journal article supplement (doi:10.3390/bios13060585), 2023-05-28
Supplement: s1 [file s1]

# Iodide-Mediated Etching of Gold Nanostar for the Multicolor Visual Detection of Hydrogen Peroxide

Yunping Lai <sup>1,†</sup>, Beirong Yu <sup>1,†</sup>, Tianran Lin <sup>1,\*</sup> and Li Hou <sup>1,\*</sup>

<sup>1</sup> School of Chemistry and Pharmaceutical Sciences, State Key Laboratory for the Chemistry and Molecular Engineering of Medicinal Resources, Guangxi Normal University, Guilin 541004, China; lyp159357@stu.gxnu.edu.cn (Y.L.); yubeirong@stu.gxnu.edu.cn (B.Y.);

\* Correspondence: tianran@gxnu.edu.cn (T.L.); houli@mailbox.gxnu.edu.cn (L.H.)

<sup>†</sup> These authors contributed equally to this paper.

**Table S1.** Comparative analysis of this method with other colorimetric methods for detecting H<sub>2</sub>O<sub>2</sub>.

| Method       | Recognition/Sensing elements                         | Substrate | Color changes | Limit of detection (μmol L <sup>-1</sup> ) | Reference |
|--------------|------------------------------------------------------|-----------|---------------|--------------------------------------------|-----------|
| Colorimetric | MFe <sub>2</sub> O <sub>4</sub>                      | OPD       | Single color  | 30                                         | [1]       |
| Colorimetric | MnCo <sub>2</sub> O <sub>4</sub>                     | OPD       | Single color  | 200                                        | [2]       |
| Colorimetric | AuAgPd TNPs                                          | OPD       | Single color  | 5.6                                        | [3]       |
| Colorimetric | Fe, N-CD                                             | OPD       | Single color  | 0.05                                       | [4]       |
| Colorimetric | PtNWs-PNFs/GO                                        | TMB       | Single color  | 0.0206                                     | [5]       |
| Colorimetric | Fe-NDs                                               | TMB       | Single color  | 0.3                                        | [6]       |
| Colorimetric | Fe-C-NNs                                             | TMB       | Single color  | 4.36                                       | [7]       |
| Colorimetric | Co <sub>3</sub> (PO <sub>4</sub> )·8H <sub>2</sub> O | TMB       | Single color  | 4.385                                      | [8]       |
| Colorimetric | Au NS                                                | Au NS     | Multicolor    | 0.44                                       | This work |

## References

1. Vetr, F.; Moradi-Shoeili, Z.; Özkar, S. Oxidation of o-phenylenediamine to 2,3-diaminophenazine in the presence of cubic ferrites  $MFe_2O_4$  ( $M = Mn, Co, Ni, Zn$ ) and the application in colorimetric detection of  $H_2O_2$ . *Appl Organomet Chem* **2018**, *32*, e4465, doi:10.1002/aoc.4465.
2. Vetr, F.; Moradi-Shoeili, Z.; Özkar, S. Mesoporous  $MnCo_2O_4$  with efficient peroxidase mimetic activity for detection of  $H_2O_2$ . *Inorg. Chem Commun* **2018**, *98*, 184-191, doi:10.1016/j.inoche.2018.10.024.
3. Kong, J.; Zheng, J.; Li, Z.; Huang, J.; Cao, F.; Zeng, Q.; Li, F. One-pot synthesis of AuAgPd trimetallic nanoparticles with peroxidase-like activity for colorimetric assays. *Anal Bioanal Chem* **2021**, *413*, 5383-5393, doi:10.1007/s00216-021-03514-1.
4. Wang, L.; Liu, Y.; Yang, Z.; Wang, Y.; Rao, H.; Yue, G.; Wu, C.; Lu, C.; Wang, X. A ratiometric fluorescence and colorimetric dual-mode assay for  $H_2O_2$  and xanthine based on Fe, N co-doped carbon dots. *Dyes Pigm* **2020**, *180*, 108486, doi:10.1016/j.dyepig.2020.108486.
5. Zhu, D.; He, P.; Kong, H.; Yang, G.; Luan, X.; Wei, G. Biomimetic graphene-supported ultrafine platinum nanowires for colorimetric and electrochemical detection of hydrogen peroxide. *J Mater Chem B* **2022**, *10*, 9216-9225, doi:10.1039/d2tb02132c.
6. Liu, Y.; Yan, J.; Huang, Y.; Sun, Z.; Zhang, H.; Fu, L.; Li, X.; Jin, Y. Single-Atom Fe-Anchored Nano-Diamond With Enhanced Dual-Enzyme Mimicking Performance for  $H_2O_2$  and Glutathione Detection. *Front Bioeng Biotechnol* **2021**, *9*, 790849, doi:10.3389/fbioe.2021.790849.
7. Lu, W.; Chen, S.; Zhang, H.; Qiu, J.; Liu, X. Fe N C single atom nanozymes with dual enzyme-mimicking activities for colorimetric detection of hydrogen peroxide and glutathione. *J Materiomics* **2022**, *8*, 1251-1259, doi:10.1016/j.jmat.2022.04.011.
8. Peng, L.-J.; Zhou, H.-Y.; Zhang, C.-Y.; Yang, F.-Q. Study on the peroxidase-like activity of cobalt phosphate and its application in colorimetric detection of hydrogen peroxide. *Colloids Surf A Physicochem Eng Asp* **2022**, *647*, 129031, doi:10.1016/j.colsurfa.2022.129031.
